# Supplementary material for: Understanding the prebiotic potential of different dietary fibers using an in vitro continuous adult fermentation model (PolyFermS)
Source: PubMed Central journal article supplement (PMC5847601; doi:10.1038/s41598-018-22438-y), 2018-03-12
Supplement: 41598_2018_22438_MOESM1_ESM.pdf [file 41598_2018_22438_MOESM1_ESM.pdf]

# Understanding the prebiotic potential of different dietary fibers using an *in vitro* continuous adult fermentation model (PolyFermS)

Sophie A. Poeker<sup>1</sup>, Annelies Geirnaert<sup>1</sup>, Laura Berchtold<sup>1</sup>, Anna Greppi<sup>1</sup>, Lukasz Krych<sup>2</sup>, Robert E. Steinert<sup>3</sup>, Tomas de Wouters<sup>1</sup> and Christophe Lacroix<sup>1\*</sup>

| Dietary fiber       | Trade name, Supplier                                 | Full name                         | Sugar moieties     | Linkage                                            | Degree of polymerization           | Structure                                                                            | Source                  | Purity                                                                                   |
|---------------------|------------------------------------------------------|-----------------------------------|--------------------|----------------------------------------------------|------------------------------------|--------------------------------------------------------------------------------------|-------------------------|------------------------------------------------------------------------------------------|
| Inulin-type fructan | Fibrulose F97 (Cosucra Group, Warcoing, Belgium)     | Fructo-oligosaccharide            | fructose, glucose  | $\beta$ -(2,1)<br>terminal Glc:<br>$\alpha$ -(1,2) | 2-20                               | 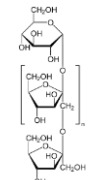  | chicory roots           | DM: 96 ± 1 %<br>DP ≤ 10: 70 ± 5% on DM<br>DP ≤ 20: 94 ± 5% on DM<br>DP >20: 5 ± 5% on DM |
| $\alpha$ -GOS       | Cravingz' Gone® P (Olygose, Compiègne Cedex, France) | $\alpha$ -galacto-oligosaccharide | galactose, glucose | $\alpha$ -(1,6)                                    | 2 (melibiose)<br>3 (manninotriose) |   | peas                    | 99%                                                                                      |
| $\beta$ -glucan     | Beta Glucan Powder (CEPARO, Edmonton, Canada)        | $\beta$ -(1,3)-(1,4)-D-glucan     | glucose            | $\beta$ -(1,3)<br>$\beta$ -(1,4)                   | fiber                              |   | oats                    | 90%                                                                                      |
| XOS                 | XOS 95P (Longlive, Shandong, China)                  | Xylo-oligosaccharide              | D-xylose           | $\beta$ -(1,4)                                     | 2-7                                |  | ligno-cellulosic wastes | ≥95% DP 2-7                                                                              |

**Supplementary Table S1:** Characteristics of the dietary fibers used for medium supplementation during treatment periods.

| Phylum          | D3  | D4  |
|-----------------|-----|-----|
| Firmicutes      | 51% | 57% |
| Bacteroidetes   | 25% | 32% |
| Euryarchaeota   | 9%  | 2%  |
| Actinobacteria  | 6%  | 6%  |
| Verrucomicrobia | 6%  | -   |
| Proteobacteria  | 3%  | 1%  |
| Tenericutes     | -   | 3%  |

  

| Phylum          | Family                       | D3           | D4           |
|-----------------|------------------------------|--------------|--------------|
| Firmicutes      | <i>Ruminococcaceae</i>       | 20.9%        | 19.7%        |
| Firmicutes      | <i>Lachnospiraceae</i>       | 7.3%         | 13.4%        |
| Bacteroidetes   | <i>Bacteroidaceae</i>        | 16.9%        | 8.4%         |
| Bacteroidetes   | <i>Prevotellaceae</i>        | 0.1%         | 17.2%        |
| Euryarchaeota   | <i>Methanobacteriaceae</i>   | 8.7%         | 1.6%         |
| Firmicutes      | <i>Oscillospiraceae</i>      | 6.8%         | 4.0%         |
| Bacteroidetes   | <i>Rikenellaceae</i>         | 6.0%         | 3.4%         |
| Verrucomicrobia | <i>Verrucomicrobiaceae</i>   | 6.2%         | 0.0%         |
| Firmicutes      | Unclassified Clostridiales   | 2.7%         | 5.3%         |
| Firmicutes      | <i>Eubacteriaceae</i>        | 4.3%         | 7.1%         |
| Actinobacteria  | <i>Bifidobacteriaceae</i>    | 3.6%         | 4.1%         |
| Firmicutes      | <i>Clostridiaceae</i>        | 2.9%         | 1.5%         |
| Firmicutes      | unclassified                 | 0.2%         | 2.4%         |
| Proteobacteria  | RF32: unclassified           | 0.1%         | -            |
| Bacteroidetes   | <i>Porphyromonadaceae</i>    | 2.3%         | 3.6%         |
| Firmicutes      | <i>Peptostreptococcaceae</i> | 2.2%         | 1.2%         |
| Firmicutes      | <i>Ensiplotrachaceae</i>     | 0.8%         | 2.1%         |
| Proteobacteria  | <i>Desulfotribionaceae</i>   | 2.0%         | 0.2%         |
| Bacteroidetes   | <i>Odoribacteriaceae</i>     | -            | -            |
| Actinobacteria  | <i>Coriobacteriaceae</i>     | 1.5%         | 1.3%         |
| Bacteroidetes   | <i>Paraprevotellaceae</i>    | -            | -            |
| Firmicutes      | <i>Acidaminococcaceae</i>    | 0.3%         | -            |
| Firmicutes      | <i>Christenellaceae</i>      | 0.9%         | 0.3%         |
| Firmicutes      | <i>Ensiplotrachaceae</i>     | 0.8%         | 2.1%         |
| Firmicutes      | <i>Veillonellaceae</i>       | 0.7%         | 0.6%         |
|                 | <b>Sum</b>                   | <b>98.2%</b> | <b>99.5%</b> |

**Supplementary Table S2:** Taxonomic summary of fecal microbiota of selected healthy human donors for PolyFermS experiments. Abundance of phyla (Table 2. A) and families (Table 2. B) obtained by 16S amplicon sequencing of V4 region.

| Shannon index  |             |                |             |                |             |
|----------------|-------------|----------------|-------------|----------------|-------------|
| Fermentation 1 |             | Fermentation 2 |             | Fermentation 3 |             |
| D3             | 5.77 ± 0.92 | D4             | 5.82 ± 0.89 | D3             | 3.84 ± 0.39 |
| IR_D12         | 4.52 ± 0.01 | IR_D8          | 3.58 ± 0.41 | IR_D8          | 4.07 ± 0.01 |
| IR_D19         | 4.33 ± 0.52 | IR_D14         | 3.35 ± 0.38 | IR_D14         | 4.02 ± 0.01 |
| IR_D24         | 4.39 ± 0.51 | IR_D19         | 3.37 ± 0.31 | CR_D8          | 3.89 ± 0.43 |
| TR_D31         | 4.32 ± 0.54 | IR_D25         | 3.37 ± 0.36 | CR_D14         | 3.83 ± 0.39 |
| CR_D12         | 4.08 ± 0.53 | IR_D31         | 3.91 ± 0.41 |                |             |
| CR_D19         | 4.30 ± 0.45 | IR_D37         | 3.86 ± 0.49 |                |             |
| CR_D24         | 4.15 ± 0.47 | CR_D8          | 3.61 ± 0.39 |                |             |
| CR_D31         | 4.35 ± 0.52 | CR_D14         | 3.60 ± 0.39 |                |             |
|                |             | CR_D14         | 3.49 ± 0.39 |                |             |
|                |             | CR_D25         | 3.34 ± 0.40 |                |             |
|                |             | CR_D31         | 3.77 ± 0.37 |                |             |
|                |             | CR_D37         | 3.73 ± 0.42 |                |             |

**Supplementary Table S3:** Mean Shannon diversity index of inoculum reactor (IR) and control reactor (CR) samples for different time points along the fermentation periods. Data shown are means ± SD obtained of 11 replicates per sample.

| Phylum          | Fermentation 1 |        |        |        |        |        |        |        |
|-----------------|----------------|--------|--------|--------|--------|--------|--------|--------|
|                 | IR_d12         | IR_d19 | IR_d24 | IR_d31 | CR_d12 | CR_d19 | CR_d24 | CR_d31 |
| Firmicutes      | 58%            | 56%    | 54%    | 62%    | 65%    | 55%    | 42%    | 57%    |
| Bacteroidetes   | 27%            | 25%    | 22%    | 16%    | 24%    | 28%    | 37%    | 28%    |
| Proteobacteria  | 14%            | 18%    | 22%    | 15%    | 11%    | 15%    | 21%    | 13%    |
| Euryarchaeota   | 1%             | 1%     | 1%     | 2%     | 0%     | 2%     | 0%     | 2%     |
| Actinobacteria  | 0%             | 0%     | 0%     | 5%     | 0%     | 0%     | 0%     | 0%     |
| Verrucomicrobia | 0%             | 0%     | 0%     | 0%     | 0%     | 0%     | 0%     | 0%     |

| Phylum          | Fermentation 2 |        |        |        |        |        |       |        |        |        |        |        |
|-----------------|----------------|--------|--------|--------|--------|--------|-------|--------|--------|--------|--------|--------|
|                 | IR_d8          | IR_d14 | IR_d19 | IR_d25 | IR_d31 | IR_d37 | CR_d8 | CR_d14 | CR_d19 | CR_d25 | CR_d31 | CR_d37 |
| Bacteroidetes   | 56%            | 60%    | 60%    | 61%    | 50%    | 52%    | 61%   | 62%    | 62%    | 62%    | 52%    | 56%    |
| Firmicutes      | 40%            | 34%    | 34%    | 35%    | 41%    | 33%    | 35%   | 33%    | 32%    | 34%    | 40%    | 36%    |
| Proteobacteria  | 4%             | 6%     | 6%     | 3%     | 9%     | 14%    | 4%    | 5%     | 5%     | 3%     | 7%     | 7%     |
| Actinobacteria  | 0%             | 0%     | 0%     | 0%     | 0%     | 0%     | 0%    | 0%     | 0%     | 0%     | 0%     | 0%     |
| Euryarchaeota   | 0%             | 0%     | 0%     | 0%     | 0%     | 0%     | 0%    | 0%     | 0%     | 0%     | 0%     | 0%     |
| Verrucomicrobia | 0%             | 0%     | 0%     | 0%     | 0%     | 0%     | 0%    | 0%     | 0%     | 0%     | 0%     | 0%     |

**Supplementary Table S4:** Summary microbial phyla obtained by V4 region 16S amplicon sequencing within non-treated PolyFermS reactors. Inoculum reactor (IR) and control reactor (CR) with donor 3 microbiota (Fermentation 1) on day 12, day 19, day 24 and day 31. Inoculum reactor (IR) and control reactor (CR) with donor 4 microbiota (Fermentation 2) on day 8, day 14, day 19, day 25, day 31 and day 37.

| Phylum         | Family                    | Fermentation 1 |        |        |        |        |        |        |        |
|----------------|---------------------------|----------------|--------|--------|--------|--------|--------|--------|--------|
|                |                           | IR_d12         | IR_d19 | IR_d24 | IR_d31 | CR_d12 | CR_d19 | CR_d24 | CR_d31 |
| Bacteroidetes  | <i>Bacteroidaceae</i>     | 27.0%          | 25.4%  | 22.3%  | 16.2%  | 23.4%  | 28.3%  | 37.1%  | 27.7%  |
| Firmicutes     | <i>Lachnospiraceae</i>    | 13.4%          | 13.1%  | 12.0%  | 8.4%   | 14.0%  | 14.8%  | 9.8%   | 19.3%  |
| Firmicutes     | <i>Acidaminococcaceae</i> | 12.6%          | 10.5%  | 11.6%  | 11.2%  | 15.1%  | 11.8%  | 10.4%  | 11.5%  |
| Firmicutes     | <i>Ruminococcaceae</i>    | 18.4%          | 19.4%  | 13.8%  | 21.8%  | 20.7%  | 6.7%   | 5.6%   | 11.4%  |
| Proteobacteria | <i>Enterobacteriaceae</i> | 9.6%           | 14.9%  | 19.6%  | 14.4%  | 5.5%   | 8.8%   | 14.0%  | 9.9%   |
| Firmicutes     | <i>Eubacteriaceae</i>     | 8.6%           | 7.6%   | 10.5%  | 15.1%  | 4.9%   | 16.3%  | 12.7%  | 8.2%   |

| Phylum        | Family                 | Fermentation 2 |        |        |        |        |        |       |        |        |        |        |        |
|---------------|------------------------|----------------|--------|--------|--------|--------|--------|-------|--------|--------|--------|--------|--------|
|               |                        | IR_d8          | IR_d14 | IR_d19 | IR_d25 | IR_d31 | IR_d37 | CR_d8 | CR_d14 | CR_d19 | CR_d25 | CR_d31 | CR_d37 |
| Bacteroidetes | <i>Prevotellaceae</i>  | 52.8%          | 58.4%  | 58.2%  | 58.1%  | 44.3%  | 48.6%  | 50.6% | 52.7%  | 57.9%  | 58.2%  | 48.4%  | 52.3%  |
| Firmicutes    | <i>Ruminococcaceae</i> | 19.7%          | 19.6%  | 18.0%  | 18.9%  | 25.0%  | 14.0%  | 17.1% | 17.0%  | 14.3%  | 20.1%  | 21.0%  | 18.9%  |
| Firmicutes    | <i>Lachnospiraceae</i> | 8.5%           | 5.9%   | 6.8%   | 8.1%   | 6.6%   | 9.8%   | 8.0%  | 7.3%   | 5.5%   | 5.9%   | 5.5%   | 6.8%   |
| Firmicutes    | unclassified           | 3.6%           | 2.9%   | 3.8%   | 3.3%   | 4.0%   | 3.7%   | 3.6%  | 3.5%   | 7.1%   | 4.0%   | 7.1%   | 4.4%   |
| Firmicutes    | Lactobacillales        |                |        |        |        |        |        |       |        |        |        |        |        |
| Bacteroidetes | <i>Bacteroidaceae</i>  | 2.6%           | 1.8%   | 1.8%   | 2.5%   | 4.8%   | 2.5%   | 10.1% | 9.2%   | 3.7%   | 3.4%   | 3.6%   | 2.8%   |

**Supplementary Table S5:** Summary of most abundant (>5%) microbial families obtained by 16S V4 region amplicon sequencing within non-treated PolyFermS reactors. Inoculum reactor (IR) and control reactor (CR) with donor 3 microbiota (Fermentation 1) on day 12, day 19, day 24 and day 31. Inoculum reactor (IR) and control reactor (CR) with donor 4 microbiota (Fermentation 2) on day 8, day 14, day 19, day 25, day 31 and day 37.

**A**

| Ferm              |                  | Total SCFAs                |                            |                             |                            |  |
|-------------------|------------------|----------------------------|----------------------------|-----------------------------|----------------------------|--|
|                   |                  | Inulin                     | b-glucan                   | XOS                         | α-GOS                      |  |
| 1                 | Stabilization I  | 138.54 ± 3.35              | 131.24 ± 2.84              | 136.82 ± 2.75               | 113.93 ± 6.39              |  |
|                   | Treatment I      | 143.68 ± 6.11              | 133.91 ± 6.53              | 161.64 ± 7.13               | 167.79 ± 5.54 <sup>c</sup> |  |
|                   | Stabilization II | 125.91 ± 13.84             | 120.94 ± 7.93              | 116.25 ± 4.96               |                            |  |
|                   | Treatment II     | 150.11 ± 6.35              | 157.71 ± 20.83             | 162.35 ± 12.09 <sup>b</sup> |                            |  |
| 2                 | Stabilization I  | 133.67 ± 7.62              | 138.87 ± 10.12             | 133.77 ± 3.63               | 142.38 ± 2.83              |  |
|                   | Treatment I      | 154.40 ± 2.84 <sup>a</sup> | 154.83 ± 12.85             | 160.48 ± 5.29 <sup>b</sup>  | 175.48 ± 9.37 <sup>b</sup> |  |
|                   | Stabilization II | 166.89 ± 3.17              | 145.75 ± 14.44             | 139.69 ± 7.05               | 138.92 ± 6.81              |  |
|                   | Treatment II     | 175.84 ± 2.45 <sup>a</sup> | 172.62 ± 1.88 <sup>a</sup> | 178.03 ± 3.56 <sup>b</sup>  | 174.76 ± 3.89 <sup>b</sup> |  |
| <b>Acetate</b>    |                  | <b>Inulin</b>              | <b>b-glucan</b>            | <b>XOS</b>                  | <b>α-GOS</b>               |  |
| 1                 | Stabilization I  | 68.56 ± 0.59               | 56.37 ± 1.96               | 56.37 ± 1.76                | 56.88 ± 3.88               |  |
|                   | Treatment I      | 80.82 ± 3.37 <sup>b</sup>  | 54.90 ± 1.01               | 92.62 ± 1.76 <sup>b</sup>   | 85.10 ± 6.30 <sup>b</sup>  |  |
|                   | Stabilization II | 54.26 ± 6.38               | 59.41 ± 4.60               | 66.32 ± 0.28                |                            |  |
|                   | Treatment II     | 57.02 ± 3.01               | 60.08 ± 10.48              | 92.62 ± 2.15 <sup>c</sup>   |                            |  |
| 2                 | Stabilization I  | 58.76 ± 3.31               | 59.63 ± 2.77               | 57.88 ± 0.55                | 65.44 ± 2.44               |  |
|                   | Treatment I      | 56.56 ± 2.11               | 64.38 ± 6.23               | 77.78 ± 6.14 <sup>b</sup>   | 111.78 ± 4.10 <sup>c</sup> |  |
|                   | Stabilization II | 82.31 ± 0.87               | 70.48 ± 4.94               | 58.38 ± 1.19                | 62.11 ± 1.67               |  |
|                   | Treatment II     | 74.32 ± 1.52 <sup>a</sup>  | 75.74 ± 0.58               | 89.39 ± 4.87 <sup>c</sup>   | 91.43 ± 6.82 <sup>b</sup>  |  |
| <b>Propionate</b> |                  | <b>Inulin</b>              | <b>b-glucan</b>            | <b>XOS</b>                  | <b>α-GOS</b>               |  |
| 1                 | Stabilization I  | 26.36 ± 2.10               | 24.51 ± 1.17               | 24.51 ± 0.93                | 21.96 ± 4.53               |  |
|                   | Treatment I      | 24.57 ± 2.47               | 18.78 ± 2.16 <sup>a</sup>  | 22.10 ± 0.22                | 22.70 ± 1.20               |  |
|                   | Stabilization II | 22.37 ± 3.47               | 42.22 ± 3.95               | 25.56 ± 2.02                |                            |  |
|                   | Treatment II     | 22.47 ± 2.73               | 61.12 ± 1.00 <sup>b</sup>  | 22.10 ± 1.27                |                            |  |
| 2                 | Stabilization I  | 43.17 ± 1.88               | 39.66 ± 2.18               | 38.92 ± 3.04                | 43.00 ± 1.94               |  |
|                   | Treatment I      | 54.62 ± 1.33 <sup>c</sup>  | 55.64 ± 4.75 <sup>b</sup>  | 51.78 ± 1.79 <sup>b</sup>   | 44.39 ± 4.57               |  |
|                   | Stabilization II | 48.20 ± 0.46               | 43.66 ± 3.66               | 44.28 ± 1.33                | 45.67 ± 1.87               |  |
|                   | Treatment II     | 57.34 ± 0.78 <sup>b</sup>  | 61.11 ± 10 <sup>a</sup>    | 55.72 ± 0.75 <sup>c</sup>   | 50.37 ± 1.73 <sup>a</sup>  |  |
| <b>Butyrate</b>   |                  | <b>Inulin</b>              | <b>b-glucan</b>            | <b>XOS</b>                  | <b>α-GOS</b>               |  |
| 1                 | Stabilization I  | 33.20 ± 1.10               | 39.82 ± 0.73               | 39.82 ± 0.05                | 29.63 ± 1.65               |  |
|                   | Treatment I      | 33.68 ± 0.45               | 49.91 ± 4.87 <sup>b</sup>  | 37.62 ± 0.35 <sup>a</sup>   | 52.26 ± 2.26 <sup>c</sup>  |  |
|                   | Stabilization II | 44.19 ± 4.15               | 32.95 ± 1.37               | 35.12 ± 1.00                |                            |  |
|                   | Treatment II     | 62.49 ± 9.70 <sup>a</sup>  | 64.50 ± 7.17 <sup>b</sup>  | 37.62 ± 1.00 <sup>b</sup>   |                            |  |
| 2                 | Stabilization I  | 29.28 ± 1.17               | 31.10 ± 3.40               | 30.24 ± 2.69                | 27.56 ± 0.42               |  |
|                   | Treatment I      | 38.59 ± 0.91 <sup>c</sup>  | 33.58 ± 0.74               | 29.59 ± 2.48                | 18.6 ± 1.46 <sup>c</sup>   |  |
|                   | Stabilization II | 27.92 ± 0.95               | 26.71 ± 2.73               | 33.31 ± 1.35                | 28.43 ± 1.10               |  |
|                   | Treatment II     | 38.76 ± 0.27 <sup>b</sup>  | 29.30 ± 1.36               | 29.52 ± 1.00 <sup>a</sup>   | 30.18 ± 1.36               |  |

Mean and standard error reported (n = 3).

a Significantly different from Stabilization (p < 0.05)

b Significantly different from Stabilization (p < 0.01)

c Significantly different from Stabilization (p < 0.001)

**B**

| Fermentation 3       |                            |                            |
|----------------------|----------------------------|----------------------------|
| Total SCFAs          | α-GOS                      | Inulin                     |
| <b>Stabilization</b> | 134.21 ± 1.44              | 114.10 ± 4.25              |
| <b>Treatment</b>     | 154.97 ± 5.93 <sup>a</sup> | 138.98 ± 6.51 <sup>b</sup> |
| <b>Acetate</b>       | <b>α-GOS</b>               | <b>Inulin</b>              |
| <b>Stabilization</b> | 71.98 ± 2.73               | 60.51 ± 1.60               |
| <b>Treatment</b>     | 71.67 ± 3.65               | 66.33 ± 1.75 <sup>a</sup>  |
| <b>Propionate</b>    | <b>α-GOS</b>               | <b>Inulin</b>              |
| <b>Stabilization</b> | 22.36 ± 1.74               | 17.50 ± 3.06               |
| <b>Treatment</b>     | 28.60 ± 1.75 <sup>a</sup>  | 21.24 ± 1.69               |
| <b>Butyrate</b>      | <b>α-GOS</b>               | <b>Inulin</b>              |
| <b>Stabilization</b> | 27.64 ± 1.52               | 29.79 ± 1.58               |
| <b>Treatment</b>     | 44.12 ± 0.79 <sup>c</sup>  | 41.03 ± 2.66 <sup>b</sup>  |

Mean and standard error reported (n = 3).

a Significantly different from Stabilization (p < 0.05)

b Significantly different from Stabilization (p < 0.01)

c Significantly different from Stabilization (p < 0.001)

**Supplementary Table S6:** Mean metabolite concentrations (mM) measured by HPLC in effluent samples of stable stabilization and treatment phases in test reactors. **(A)** Mean metabolite concentrations with standard error of effluent sample in Fermentation 1 (donor 3) and 2 (donor 4) during stable stabilization and fiber treatment phases (applying the stability criterion of 20 % variation on 3 consecutive days of a period). **(B)** Mean metabolite concentrations with standard error of effluent sample in Fermentation 3 (D3) (applying the stability criterion of 20 % variation on 3 consecutive days of a period). Significant differences between mean concentration before and at end of treatment period on 0.05 (a), 0.01 (b) and 0.001 (c) level indicated.

**A**

| Phylum         | Family                     | Fermentation 1 |          |      |           |      |            |      |             |      |       |      |        |      |         |
|----------------|----------------------------|----------------|----------|------|-----------|------|------------|------|-------------|------|-------|------|--------|------|---------|
|                |                            | Stab           | Inulin_I | Stab | Inulin_II | Stab | β glucan_I | Stab | β glucan_II | Stab | XOS_I | Stab | XOS_II | Stab | α GOS_I |
| Firmicutes     | <i>Ruminococcaceae</i>     | 22%            | 28%      | 28%  | 20%       | 19%  | 26%        | 21%  | 10%         | 24%  | 22%   | 19%  | 22%    | 19%  | 9%      |
| Bacteroidetes  | <i>Bacteroidaceae</i>      | 20%            | 19%      | 20%  | 20%       | 18%  | 14%        | 22%  | 18%         | 22%  | 21%   | 27%  | 22%    | 22%  | 23%     |
| Firmicutes     | <i>Eubacteriaceae</i>      | 18%            | 8%       | 12%  | 11%       | 10%  | 23%        | 7%   | 20%         | 7%   | 8%    | 6%   | 6%     | 10%  | 14%     |
| Firmicutes     | <i>Lachnospiraceae</i>     | 13%            | 13%      | 14%  | 13%       | 19%  | 9%         | 16%  | 15%         | 19%  | 20%   | 14%  | 19%    | 18%  | 13%     |
| Firmicutes     | <i>Acidaminococcaceae</i>  | 18%            | 11%      | 12%  | 10%       | 19%  | 16%        | 10%  | 13%         | 13%  | 10%   | 13%  | 15%    | 12%  | 14%     |
| Proteobacteria | <i>Enterobacteriaceae</i>  | 0%             | 10%      | 5%   | 12%       | 1%   | 2%         | 11%  | 7%          | 1%   | 7%    | 7%   | 3%     | 11%  | 11%     |
| Proteobacteria | <i>Alphaproteobacteria</i> | 1%             | 1%       | 0%   | 1%        | 2%   | 0%         | 3%   | 2%          | 2%   | 3%    | 7%   | 0%     | 2%   | 0%      |
| Euryarchaeota  | <i>Methanobacteriaceae</i> | 2%             | 3%       | 2%   | 2%        | 2%   | 2%         | 2%   | 5%          | 2%   | 2%    | 1%   | 2%     | 1%   | 2%      |
| Proteobacteria | <i>Sutterellaceae</i>      | 4%             | 1%       | 3%   | 2%        | 3%   | 3%         | 2%   | 0%          | 4%   | 3%    | 1%   | 2%     | 1%   | 0%      |
| Firmicutes     | <i>Clostridiaceae</i>      | 0%             | 2%       | 0%   | 1%        | 4%   | 0%         | 1%   | 4%          | 1%   | 0%    | 1%   | 0%     | 0%   | 5%      |
| Firmicutes     | <i>Veillonellaceae</i>     | 1%             | 1%       | 2%   | 1%        | 1%   | 1%         | 1%   | 2%          | 1%   | 1%    | 0%   | 2%     | 2%   | 1%      |
| Firmicutes     | <i>Alphaproteobacteria</i> | 1%             | 0%       | 0%   | 0%        | 1%   | 1%         | 1%   | 1%          | 2%   | 1%    | 0%   | 0%     | 0%   | 1%      |
| Firmicutes     | <i>Lactobacillales</i>     | 0%             | 0%       | 0%   | 2%        | 0%   | 1%         | 1%   | 2%          | 0%   | 0%    | 1%   | 0%     | 0%   | 1%      |
| Firmicutes     | <i>Lactobacillaceae</i>    | 0%             | 0%       | 0%   | 5%        | 0%   | 0%         | 0%   | 0%          | 0%   | 0%    | 0%   | 3%     | 0%   | 1%      |

**Supplementary Table S7 A:** Abundance on family level in fermentation samples before (stab) and at end of dietary fiber supplementation in fermentation 1 with donor 3 (D3) microbiota. For inulin, b glucan and XOS there are two repetitions performed.

B

| Phylum         | Family                     | Fermentation 2 |          |      |           |      |                  |      |                   |      |       |      |        |      |                  |     |     |
|----------------|----------------------------|----------------|----------|------|-----------|------|------------------|------|-------------------|------|-------|------|--------|------|------------------|-----|-----|
|                |                            | Stab           | Inulin_I | Stab | Inulin_II | Stab | $\beta$ glucan_I | Stab | $\beta$ glucan_II | Stab | XOS_I | Stab | XOS_II | Stab | $\alpha$ -GOS_II |     |     |
| Bacteroidetes  | <i>Prevotellaceae</i>      | 57%            | 52%      | 53%  | 58%       | 26%  | 61%              | 54%  | 58%               | 55%  | 57%   | 54%  | 52%    | 49%  | 49%              | 58% | 55% |
| Firmicutes     | <i>Ruminococcaceae</i>     | 13%            | 19%      | 16%  | 22%       | 22%  | 18%              | 22%  | 16%               | 16%  | 16%   | 13%  | 14%    | 13%  | 19%              | 17% | 14% |
| Bacteroidetes  | <i>Bacteroidaceae</i>      | 3%             | 1%       | 3%   | 2%        | 14%  | 2%               | 2%   | 4%                | 8%   | 1%    | 4%   | 3%     | 14%  | 4%               | 3%  | 2%  |
| Firmicutes     | <i>Lachnospiraceae</i>     | 7%             | 7%       | 4%   | 4%        | 9%   | 4%               | 6%   | 4%                | 6%   | 5%    | 6%   | 11%    | 6%   | 12%              | 5%  | 10% |
| Proteobacteria | <i>Desulfovibrionaceae</i> | 2%             | 2%       | 4%   | 2%        | 6%   | 1%               | 2%   | 2%                | 3%   | 3%    | 3%   | 2%     | 3%   | 2%               | 2%  | 2%  |
| Firmicutes     | <i>Eubacteriaceae</i>      | 2%             | 1%       | 1%   | 1%        | 3%   | 5%               | 2%   | 3%                | 3%   | 6%    | 4%   | 3%     | 3%   | 2%               | 1%  | 7%  |
| Firmicutes     | <i>Lactobacillales</i>     | 3%             | 4%       | 6%   | 2%        | 6%   | 1%               | 2%   | 3%                | 2%   | 5%    | 6%   | 6%     | 3%   | 5%               | 6%  | 4%  |
| Proteobacteria | <i>Sutterellaceae</i>      | 2%             | 1%       | 2%   | 3%        | 4%   | 3%               | 4%   | 3%                | 2%   | 3%    | 4%   | 3%     | 3%   | 2%               | 4%  | 2%  |
| Firmicutes     | <i>Oscillospiraceae</i>    | 1%             | 0%       | 3%   | 1%        | 3%   | 1%               | 2%   | 3%                | 2%   | 1%    | 2%   | 2%     | 2%   | 1%               | 2%  | 1%  |
| Firmicutes     | <i>Clostridiales</i>       | 0%             | 0%       | 1%   | 0%        | 3%   | 0%               | 0%   | 0%                | 1%   | 0%    | 1%   | 0%     | 1%   | 0%               | 0%  | 0%  |
| Firmicutes     | <i>Veillonellaceae</i>     | 1%             | 1%       | 1%   | 1%        | 1%   | 1%               | 2%   | 1%                | 1%   | 2%    | 1%   | 1%     | 1%   | 1%               | 1%  | 2%  |
| Firmicutes     | <i>Lactobacillaceae</i>    | 1%             | 1%       | 1%   | 1%        | 0%   | 0%               | 0%   | 1%                | 1%   | 1%    | 0%   | 0%     | 0%   | 0%               | 1%  | 0%  |
| Proteobacteria | <i>Enterobacteriaceae</i>  | 4%             | 4%       | 3%   | 1%        | 0%   | 0%               | 0%   | 0%                | 0%   | 0%    | 0%   | 0%     | 0%   | 0%               | 0%  | 1%  |
| Proteobacteria | <i>Moraxellaceae</i>       | 1%             | 6%       | 0%   | 0%        | 0%   | 0%               | 0%   | 0%                | 0%   | 0%    | 0%   | 0%     | 0%   | 0%               | 0%  | 0%  |

**Supplementary Table S7 B:** Abundance on family level in fermentation samples before (stab) and at end of dietary fiber supplementation in fermentation 2 with donor 4 (D4) microbiota. For all dietary fibers there are two repetitions performed.

A

| Phylum          | Fermentation 3 |       |        |       |        | Fermentation 1 |        |        |        |        |
|-----------------|----------------|-------|--------|-------|--------|----------------|--------|--------|--------|--------|
|                 | Feces_D3       | IR_d8 | IR_d14 | CR_d8 | CR_d14 | Feces_D3       | IR_d12 | IR_d19 | CR_d12 | CR_d19 |
| Firmicutes      | 50%            | 67%   | 68%    | 82%   | 84%    | 51%            | 58%    | 56%    | 65%    | 55%    |
| Bacteroidetes   | 31%            | 29%   | 28%    | 10%   | 6%     | 25%            | 27%    | 26%    | 23%    | 28%    |
| Proteobacteria  | 5%             | 1%    | 2%     | 7%    | 7%     | 3%             | 14%    | 18%    | 11%    | 15%    |
| Euryarchaeota   | 6%             | 2%    | 1%     | 1%    | 1%     | 9%             | 1%     | 1%     | 0%     | 1%     |
| Actinobacteria  | 4%             | 2%    | 1%     | 1%    | 1%     | 6%             | 0%     | 0%     | 0%     | 0%     |
| Verrucomicrobia | 4%             | 0%    | 0%     | 0%    | 0%     | 6%             | 0%     | 0%     | 0%     | 0%     |

B

| Phylum          | Family                     | Fermentation 3 |       |        |       |        | Fermentation 1 |        |        |        |        |
|-----------------|----------------------------|----------------|-------|--------|-------|--------|----------------|--------|--------|--------|--------|
|                 |                            | Feces_D3       | IR_d8 | IR_d14 | CR_d8 | CR_d14 | Feces_D3       | IR_d12 | IR_d19 | CR_d12 | CR_d19 |
| Firmicutes      | <i>Ruminococcaceae</i>     | 16.4%          | 16.0% | 22.5%  | 38.7% | 43.2%  | 20.9%          | 18.8%  | 19.0%  | 20.8%  | 6.6%   |
| Firmicutes      | <i>Acidaminococcaceae</i>  | 0.6%           | 22.9% | 15.7%  | 11.8% | 18.8%  | 0.3%           | 12.6%  | 10.3%  | 15.4%  | 11.9%  |
| Firmicutes      | <i>Eubacteriaceae</i>      | 3.4%           | 14.1% | 17.0%  | 19.1% | 9.6%   | 4.3%           | 8.5%   | 7.7%   | 4.9%   | 16.2%  |
| Proteobacteria  | <i>Enterobacteriaceae</i>  | 0.3%           | 0.0%  | 0.0%   | 6.1%  | 7.1%   | 0.1%           | 9.7%   | 15.0%  | 5.3%   | 8.9%   |
| Firmicutes      | <i>Lachnospiraceae</i>     | 11.0%          | 8.7%  | 8.6%   | 8.7%  | 6.5%   | 7.3%           | 13.2%  | 13.0%  | 13.9%  | 14.6%  |
| Bacteroidetes   | <i>Bacteroidaceae</i>      | 21.7%          | 29.0% | 28.3%  | 9.9%  | 6.4%   | 16.9%          | 26.9%  | 25.6%  | 23.3%  | 28.3%  |
| Euryarchaeota   | <i>Methanobacteriaceae</i> | 6.0%           | 1.9%  | 0.6%   | 0.8%  | 1.3%   | 8.7%           | 0.7%   | 0.6%   | 0.1%   | 1.4%   |
| Firmicutes      | <i>Oscillospiraceae</i>    | 8.9%           | 1.0%  | 0.6%   | 0.6%  | 0.5%   | 6.8%           | 0.9%   | 0.7%   | 0.2%   | 0.6%   |
| Verrucomicrobia | <i>Verrucomicrobiaceae</i> | 4.2%           | 0.0%  | 0.0%   | 0.0%  | 0.0%   | 6.1%           | 0.0%   | 0.0%   | 0.0%   | 0.0%   |
| Bacteroidetes   | <i>Rikenellaceae</i>       | 4.4%           | 0.0%  | 0.0%   | 0.0%  | 0.0%   | 6.1%           | 0.0%   | 0.1%   | 0.0%   | 0.1%   |

**Supplementary Table S8:** Summary microbial phyla obtained by V4 region 16S amplicon sequencing within non-treated PolyFermS reactors and their respective fecal inoculum of donor 3. **B:** Summary of most abundant (>5%) microbial families obtained by 16S V4 region amplicon sequencing within non-treated PolyFermS reactors with donor 3 (D3) microbiota. Inoculum reactor (IR) and control reactor (CR) of fermentation 1 on day 12 and day 19 and of fermentation 3 on day 8 and day 14.

| Phylum         | Family                     | Fermentation 3 |          |      |         | Fermentation 1 |          |      |           |      |         |
|----------------|----------------------------|----------------|----------|------|---------|----------------|----------|------|-----------|------|---------|
|                |                            | Stab           | Inulin_I | Stab | a GOS_I | Stab           | Inulin_I | Stab | Inulin_II | Stab | a GOS_I |
| Firmicutes     | <i>Ruminococcaceae</i>     | 41%            | 48%      | 24%  | 31%     | 22%            | 29%      | 28%  | 19%       | 19%  | 9%      |
| Bacteroidetes  | <i>Bacteroidaceae</i>      | 6%             | 6%       | 22%  | 26%     | 20%            | 19%      | 21%  | 21%       | 21%  | 23%     |
| Firmicutes     | <i>Acidaminococcaceae</i>  | 16%            | 15%      | 17%  | 16%     | 17%            | 11%      | 12%  | 10%       | 13%  | 13%     |
| Firmicutes     | <i>Lachnospiraceae</i>     | 14%            | 12%      | 9%   | 10%     | 14%            | 14%      | 14%  | 13%       | 18%  | 13%     |
| Firmicutes     | <i>Eubacteriaceae</i>      | 15%            | 9%       | 17%  | 10%     | 18%            | 8%       | 12%  | 11%       | 10%  | 14%     |
| Firmicutes     | <i>Veillonellaceae</i>     | 2%             | 2%       | 2%   | 1%      | 1%             | 2%       | 2%   | 1%        | 2%   | 1%      |
| Firmicutes     | <i>Oscillospiraceae</i>    | 1%             | 1%       | 1%   | 1%      | 0%             | 0%       | 1%   | 0%        | 0%   | 0%      |
| Firmicutes     | <i>Lactobacillaceae</i>    | 1%             | 2%       | 1%   | 1%      | 0%             | 0%       | 0%   | 4%        | 0%   | 1%      |
| Euryarchaeota  | <i>Methanobacteriaceae</i> | 1%             | 1%       | 2%   | 1%      | 2%             | 3%       | 2%   | 2%        | 1%   | 2%      |
| Actinobacteria | <i>Bifidobacteriaceae</i>  | 1%             | 1%       | 0%   | 0%      | 0%             | 0%       | 0%   | 0%        | 0%   | 3%      |
| Firmicutes     | <i>Clostridiaceae</i>      | 1%             | 1%       | 1%   | 0%      | 0%             | 2%       | 0%   | 1%        | 0%   | 5%      |
| Firmicutes     | <i>Other</i>               | 0%             | 2%       | 0%   | 0%      | 0%             | 0%       | 0%   | 2%        | 0%   | 1%      |
| Proteobacteria | <i>unclassified</i>        | 0%             | 0%       | 0%   | 0%      | 1%             | 1%       | 0%   | 1%        | 2%   | 0%      |
| Proteobacteria | <i>Sutterellaceae</i>      | 0%             | 0%       | 1%   | 0%      | 4%             | 1%       | 3%   | 2%        | 1%   | 0%      |
| Proteobacteria | <i>Enterobacteriaceae</i>  | 0%             | 0%       | 0%   | 0%      | 0%             | 10%      | 4%   | 12%       | 11%  | 11%     |

**Supplementary Table S9** Abundance on family level in fermentation samples before (stab) and at end of dietary fiber supplementation in fermentation 1 and 3 (donor 3).

## Supplementary figures

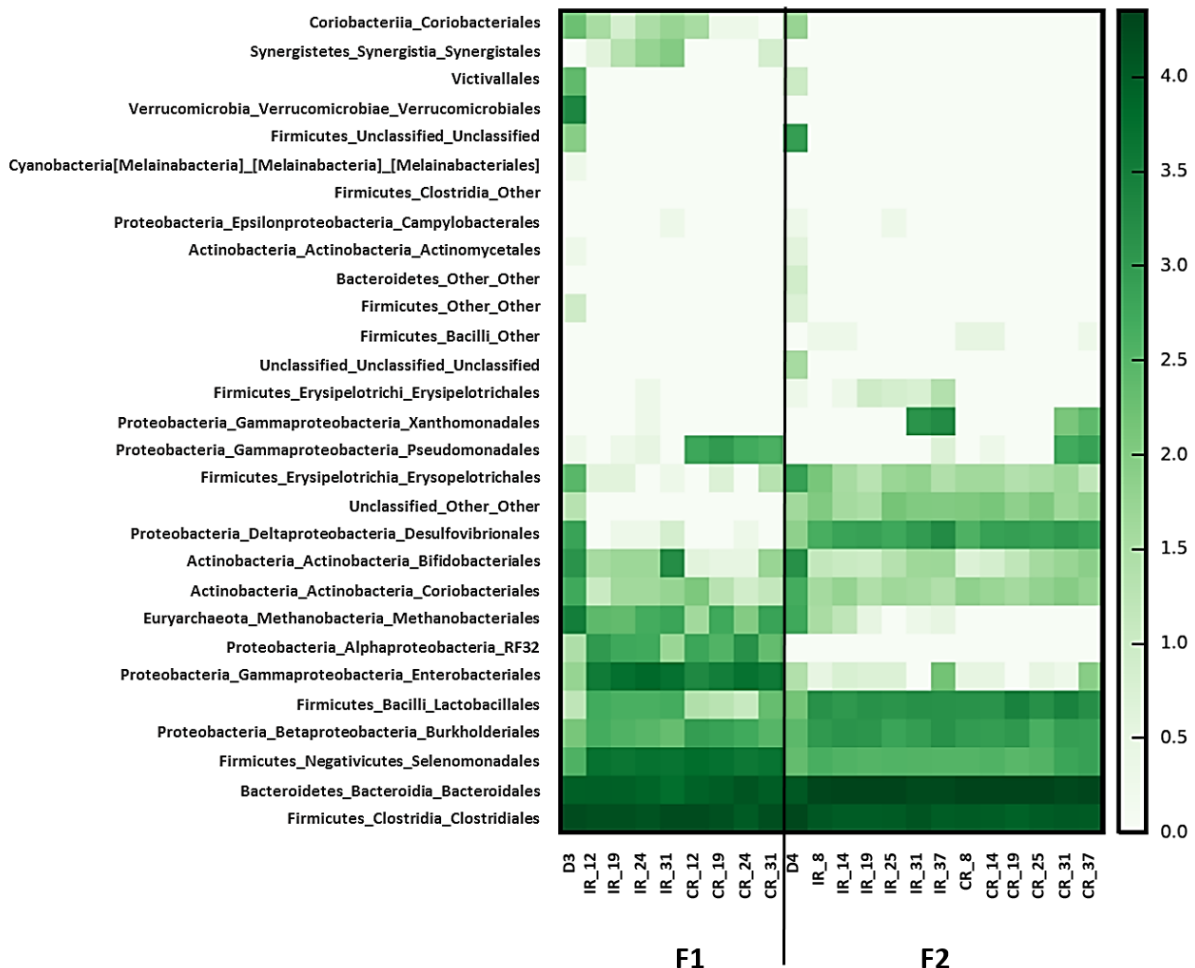

**Supplementary Figure S1:** Heatmap depicting the most abundant OTUs (> 1%) at order level in the fecal (donor 3 and donor 4) and PolyFermS microbiota of inoculum reactor (IR) and control reactor (CR) along both fermentations. Heatmap was constructed using normalized abundance of each OTU.

**A****Inoculum reactor - Fermentation 1**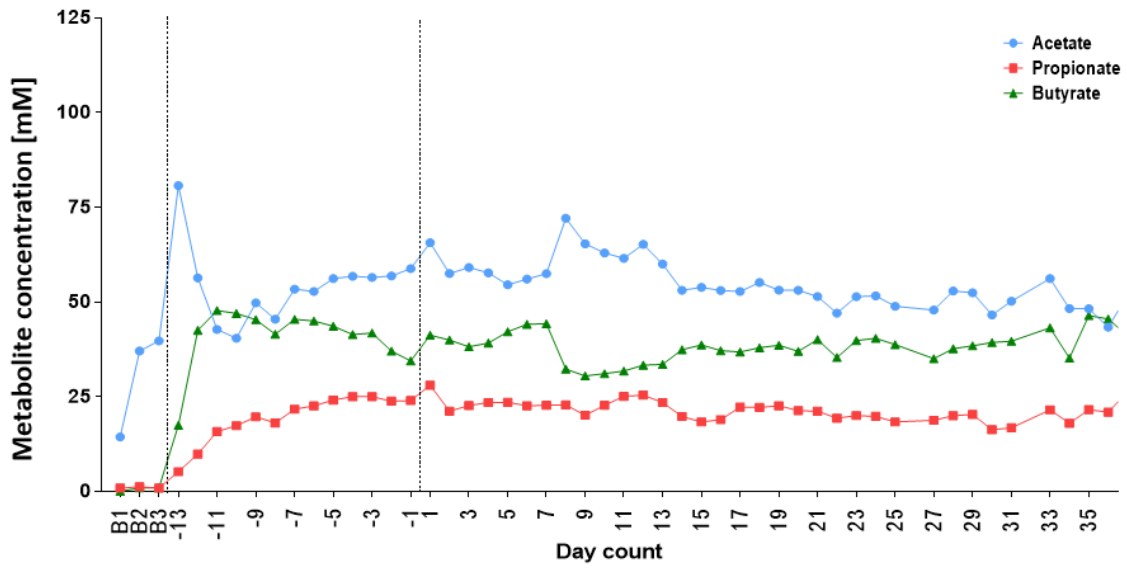**B****Inoculum reactor - Fermentation 2**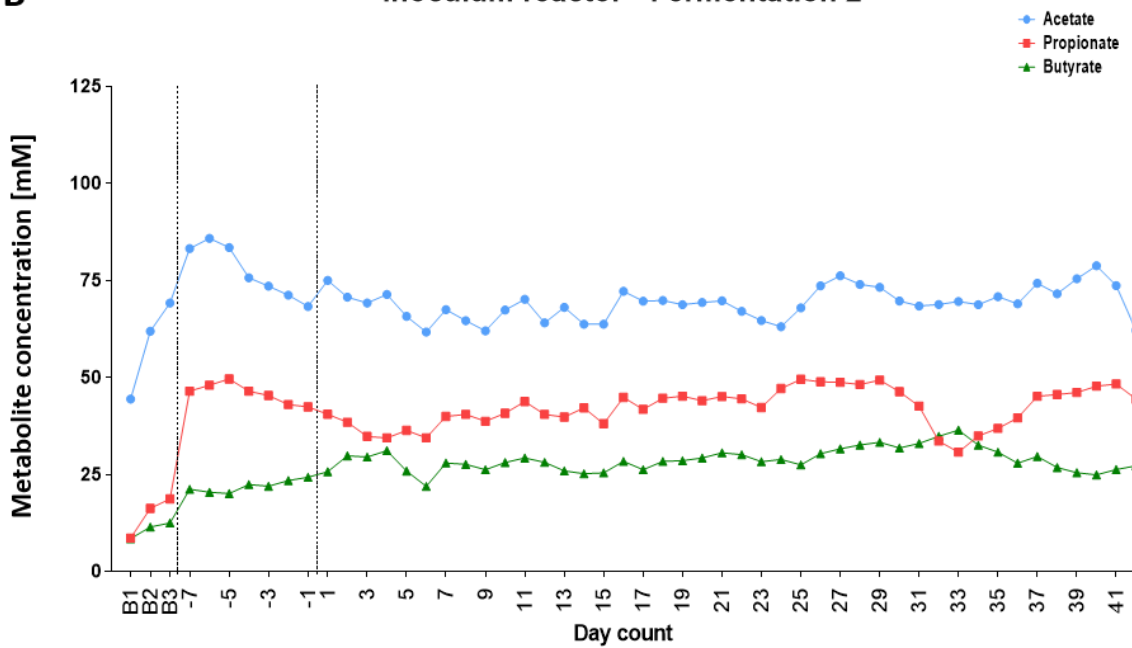

**Supplementary Figure S2:** Daily SCFA concentrations in fermentation effluents of inoculum reactor (IR) (A & C) of both PolyFermS fermentations measured by HPLC. Colonization: three consecutive batch fermentations for bead colonization. IR stabilization: stabilization period in continuous mode to reach steady-state

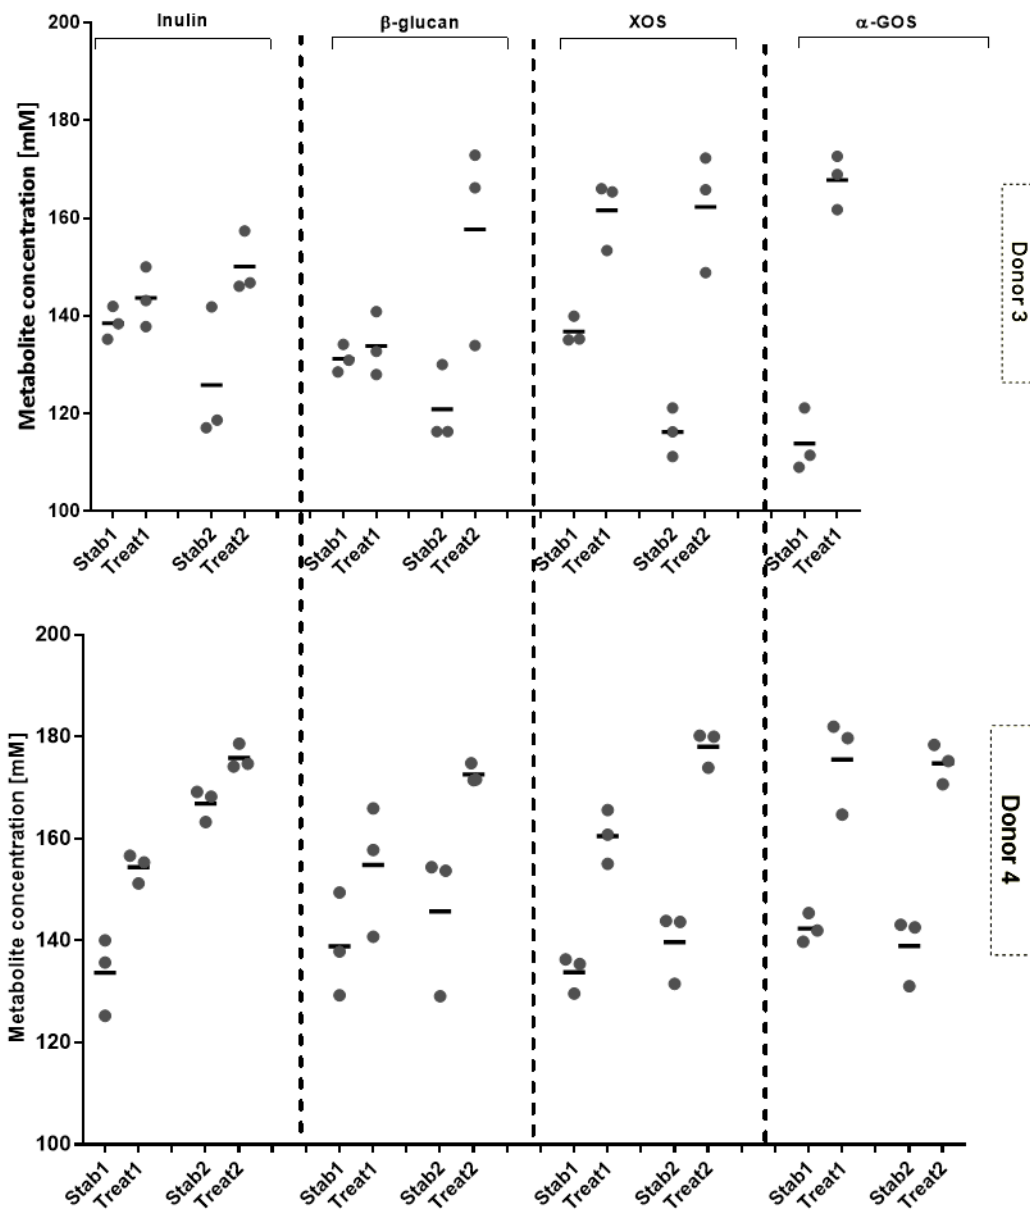

**Supplementary Figure S3:** Treatments with dietary fibers result in higher Total SCFA productions. Mean (black horizontal line) from three consecutive measurements of total SCFAs (mM) in the respective reactor at end of stabilization and treatment phase for fermentation 1 (Donor 3) and fermentation 2 (Donor 4). Two replicates are shown for each dietary fiber treatment, except  $\alpha$ -GOS in fermentation



1.

### Inoculum reactor - Fermentation 3

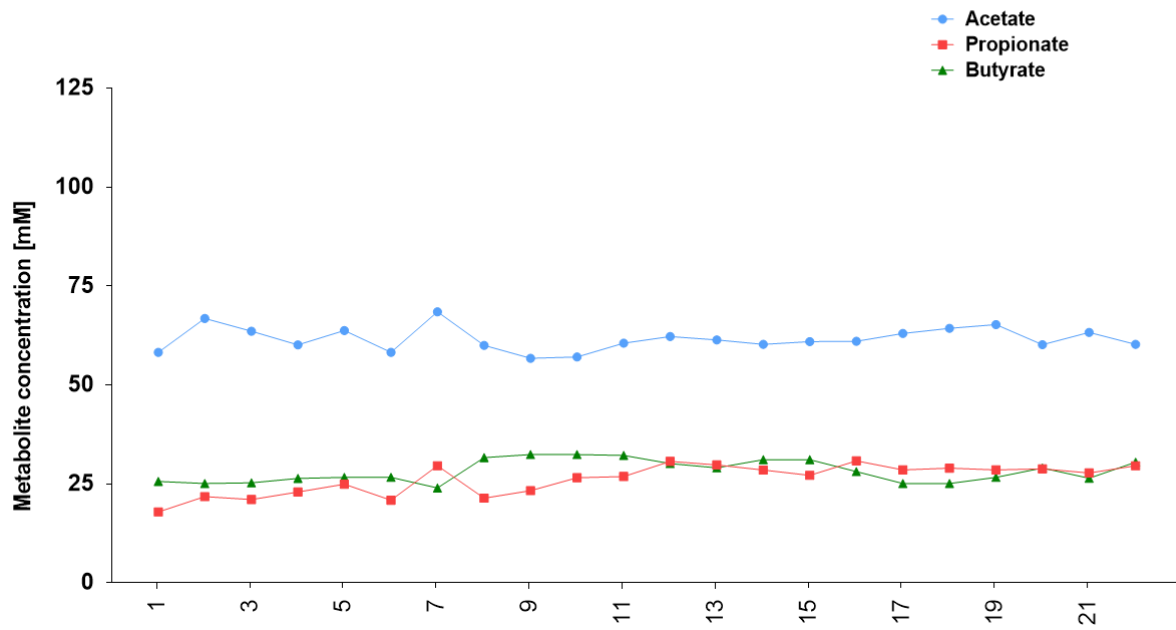

**Supplementary Figure S4:** Daily SCFA concentrations in fermentation effluents of inoculum reactor (IR) in Fermentation 3 (donor 3) measured by HPLC.

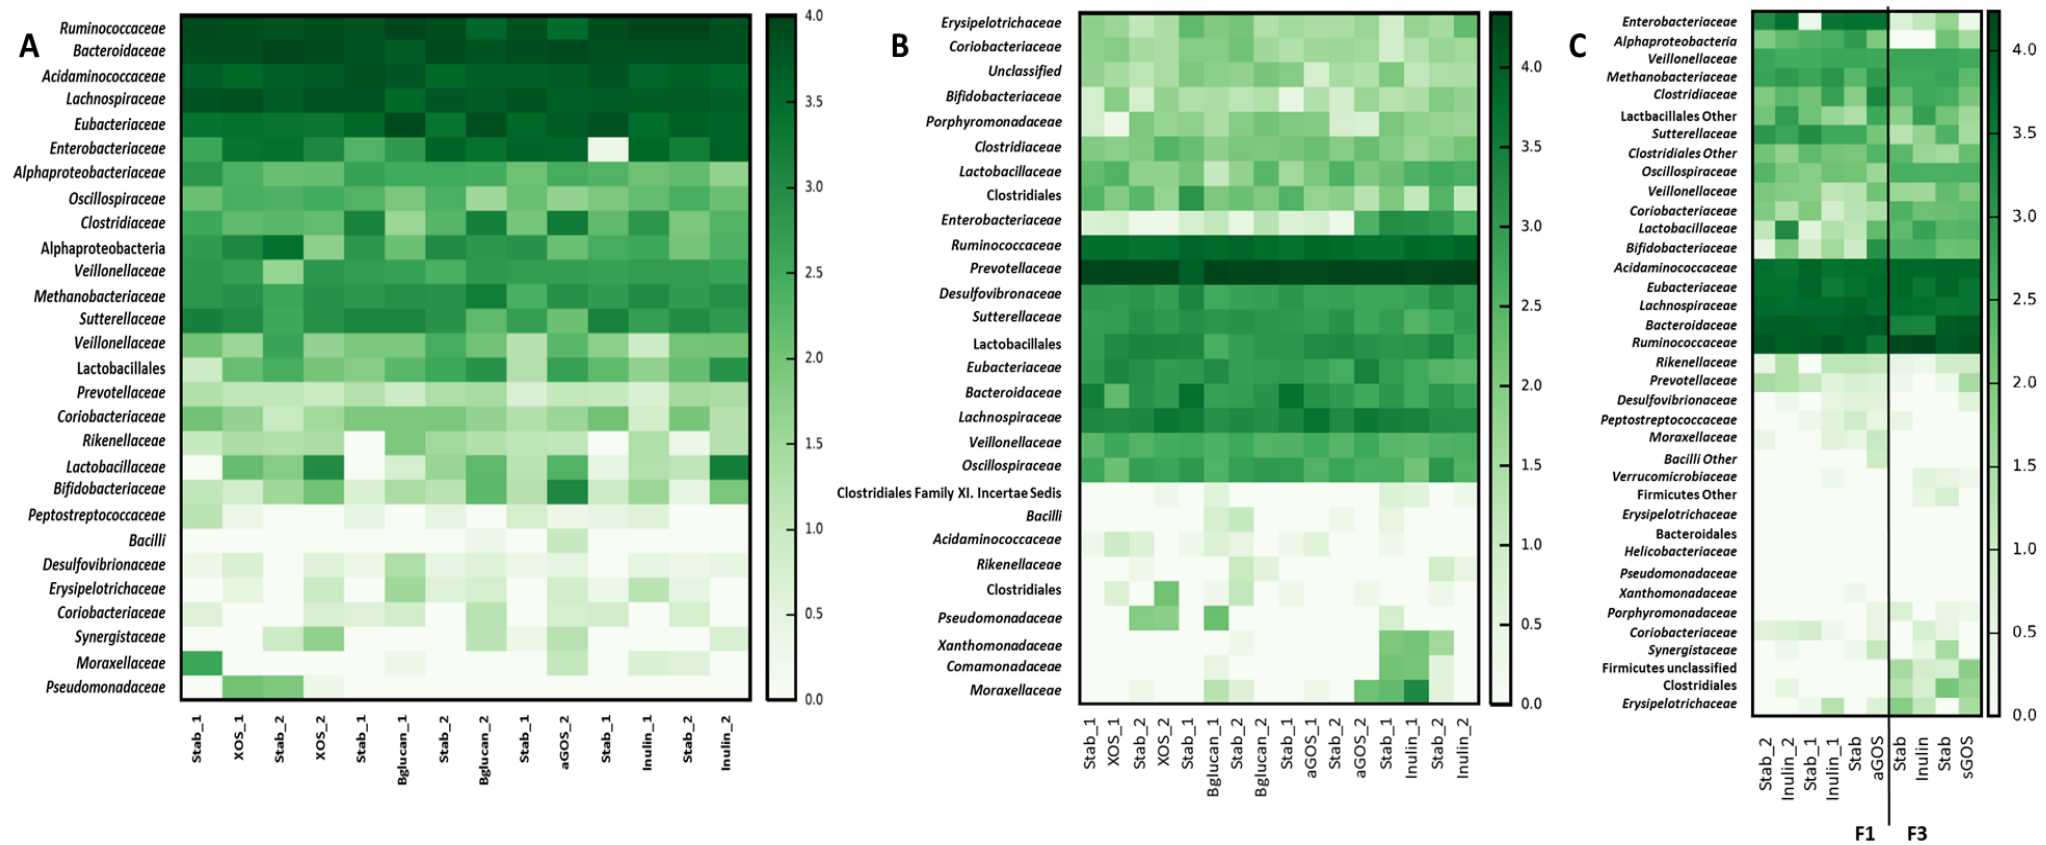

**Supplementary Figure S5:** Heatmap depicting abundance of the most abundant OTUs (> 1 %) on family level in fermentation microbiota at end of stabilization and treatment periods. Heatmap was constructed using normalized abundance of each OTU. **A:** F1 (D3), **B:** F2 (D4), **C:** F1+F3 (D3); F, fermentation; D, donor.
